# Supplementary material for: Label-free detection of nicotinamide adenine dinucleotide based on ligation-triggered exonuclease III-assisted signal amplification
Source: Royal Society of Chemistry journal article supplement (doi:10.1039/c5ra13722e), 2015-01-01
Supplement: c5ra13722e1.pdf [file c5ra13722e1.pdf]

**Label-free detection of nicotinamide adenine dinucleotide based on  
ligation-triggered exonuclease III-assisted signal amplification**

**Haiyan Zhao<sup>a</sup>, Lei Wang<sup>b</sup>, Xingtí Liu<sup>a</sup>, Zhiyue Gao<sup>a</sup>, Wei Jiang<sup>a,\*</sup>**

*<sup>a</sup> Key Laboratory for Colloid and Interface Chemistry of Education Ministry, School  
of Chemistry and Chemical Engineering, Shandong University, 250100 Jinan, P.R.  
China*

*<sup>b</sup> School of Pharmaceutical Sciences, Shandong University, 250012 Jinan, P. R.  
China*

Corresponding author: Tel: 86-531-88363888; fax: 86-531-88564464.

E-mail: [wjiang@sdu.edu.cn](mailto:wjiang@sdu.edu.cn)

**Table S1. Sequences of oligonucleotides used in this study**

| Name            | Sequence (5'→3')                               |
|-----------------|------------------------------------------------|
| Oligo1          | p-TACAAGACACAATAAC                             |
| Oligo2          | GACGGGAAG                                      |
| cDNA            | GTGTCTTGTACTTCCCGTC                            |
| G4 DNA          | CTCTTCGAGGGTTTTGGGTTTTGGGTTTTGGGAGCTA          |
| template (40nt) | AAAACCCAAAACCCAAAACCCGTGTCTTGTACTTCCC<br>GTC   |
| template (43nt) | CCCAAACCCAAAACCCAAAACCCGTGTCTTGTACTT<br>CCCGTC |
| template (34nt) | CAAACCCAAAACCCGTGTCTTGTACTTCCCGTC              |

Lower-case letter 'p' indicates phosphate group.

**Optimization of the reaction conditions**

To achieve the best performance of our signal amplification strategy, various experimental conditions were investigated, including the concentration of oligo1/oligo 2 DNA, cDNA, and G4-template DNA, the dosage of Exo III and *E. coli* DNA ligase, different pH, and the concentration of NMM.

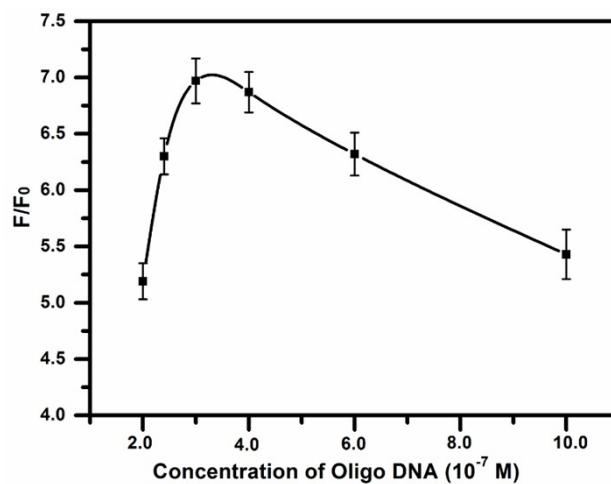

**Fig. S1.** The influence of Oligo DNA concentration on the  $\text{NAD}^+$  amplified detection system.

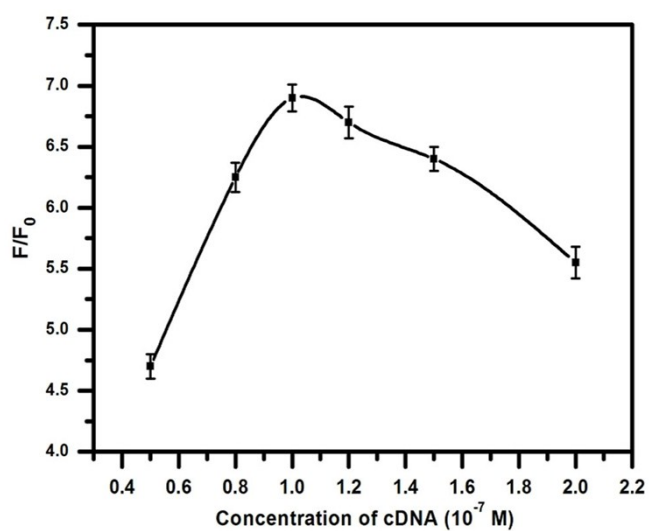

**Fig. S2.** The influence of cDNA concentration on the  $\text{NAD}^+$  amplified detection system.

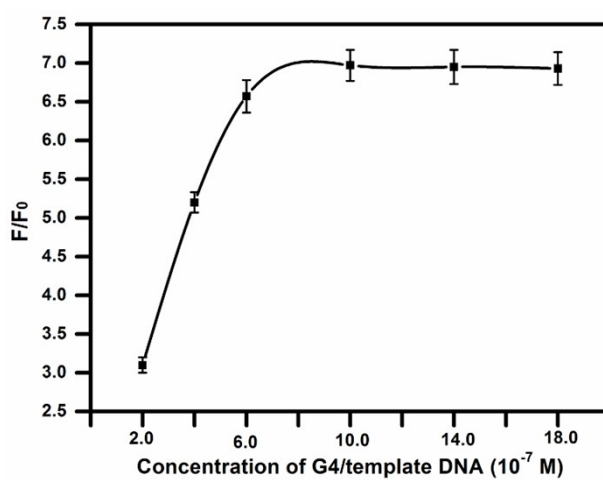

**Fig. S3.** The influence of G4/template concentration on the  $\text{NAD}^+$  amplified detection system.

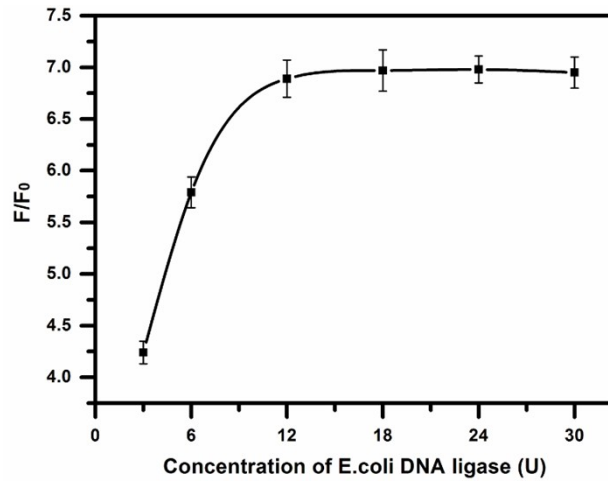

**Fig. S4.** The influence of *E. coli* DNA ligase dosage on the NAD<sup>+</sup> amplified detection system.

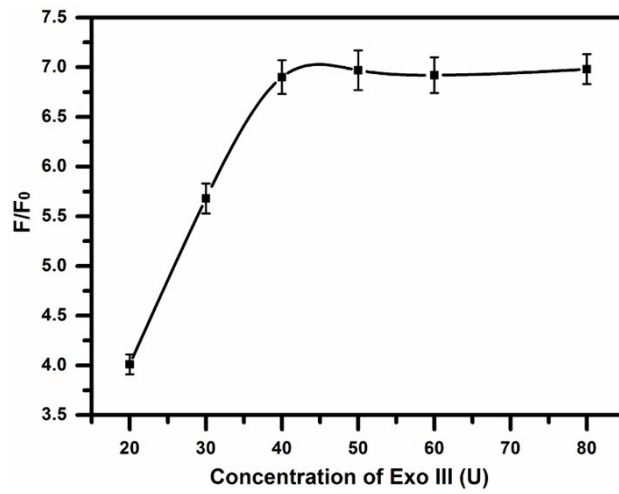

**Fig. S5.** The influence of Exo III ligase dosage on the NAD<sup>+</sup> amplified detection system.

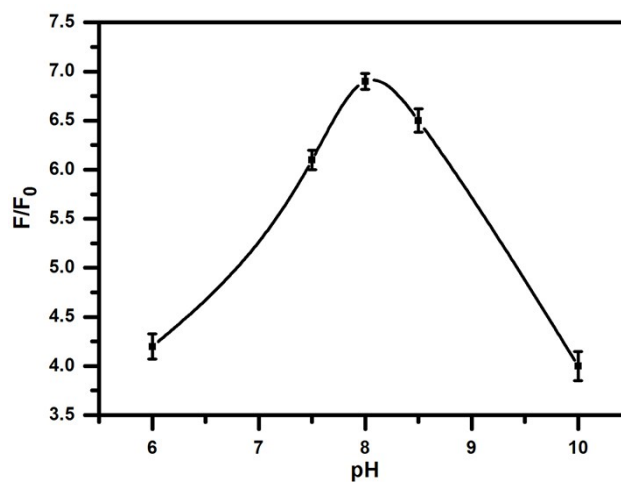

**Fig. S6.** The influence of different pH on the NAD<sup>+</sup> amplified detection system.

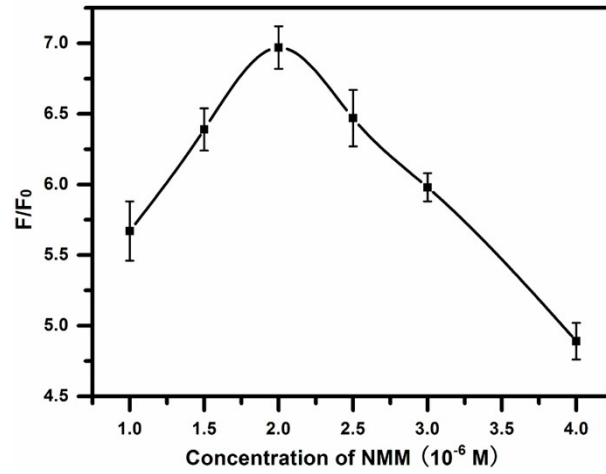

**Fig. S7.** The influence of NMM concentration on the NAD<sup>+</sup> amplified detection system.
